# Supplementary material for: CuCeTA nanoflowers as an efficient peroxidase candidate for direct colorimetric detection of glyphosate
Source: Royal Society of Chemistry journal article supplement (doi:10.1039/d3tb01455j), 2023-01-01
Supplement: d3tb01455j1.pdf [file d3tb01455j1.pdf]

## Supporting Information

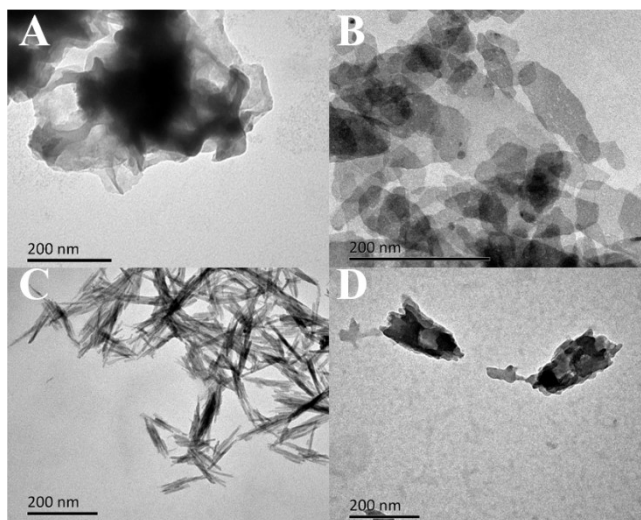

**Figure S1.** A) TEM image of CuCeTA; B) TEM image of CuTA; C) TEM image of CeTA; D) TEM image of poly(tannic acid) nanomaterials.

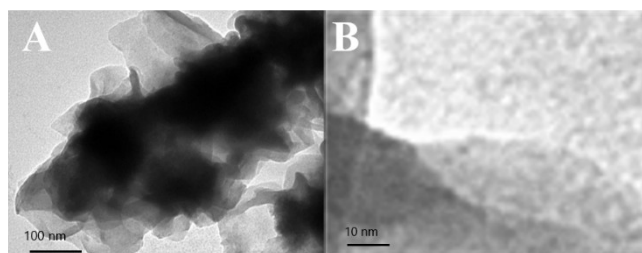

**Figure S2.** A) TEM image of CuCeTA; B) HTEM image of CuCeTA.

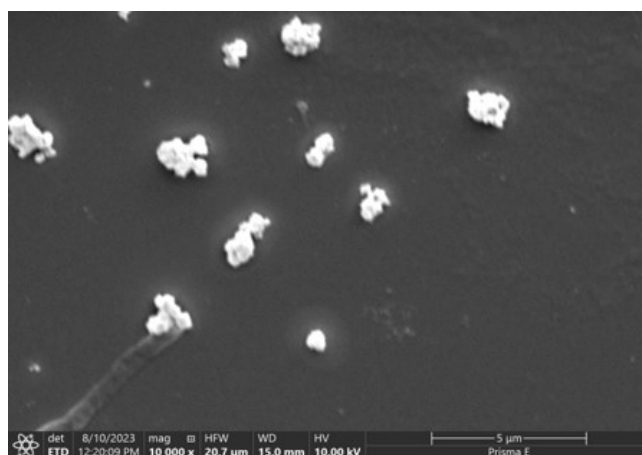

**Figure S3.** SEM image of CuCeTA.

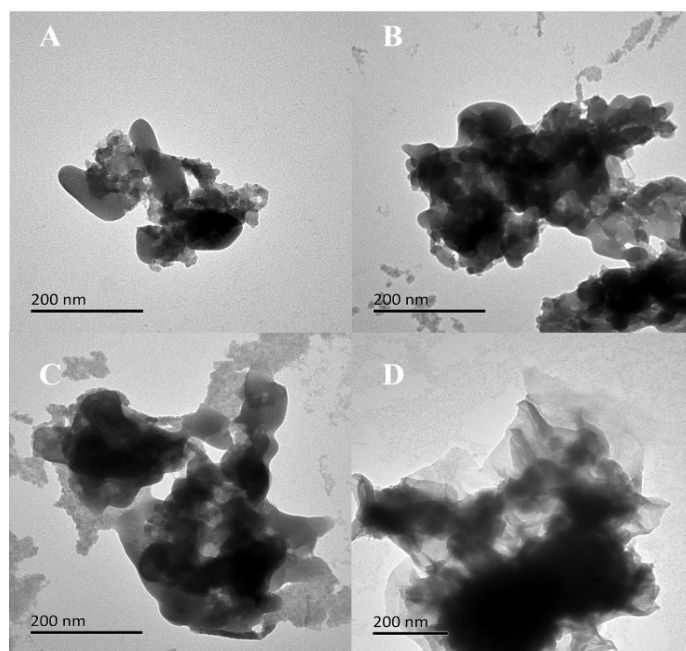

**Figure S4.** TEM images at different times: A) 0.5 h; B) 1.0 h; C) 2.0 h; D) 2.5 h.

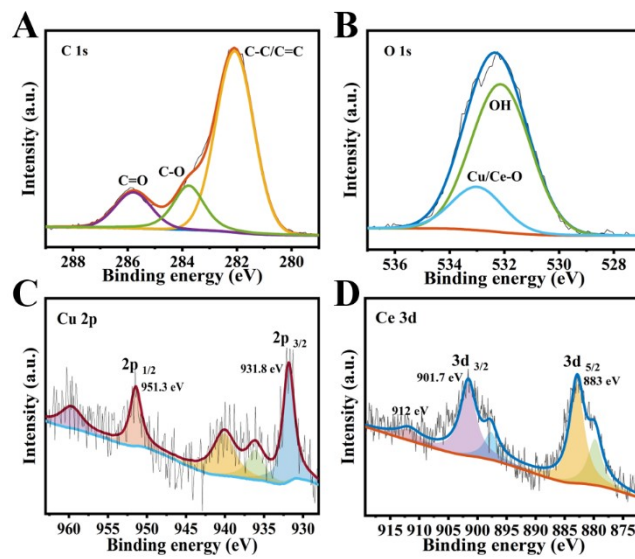

**Figure S5.** A) C 1s spectra of CuCeTA; B) O 1s spectra of CuCeTA; C) Cu 2p spectra of CuCeTA; D) Ce 3d spectra of CuCeTA.

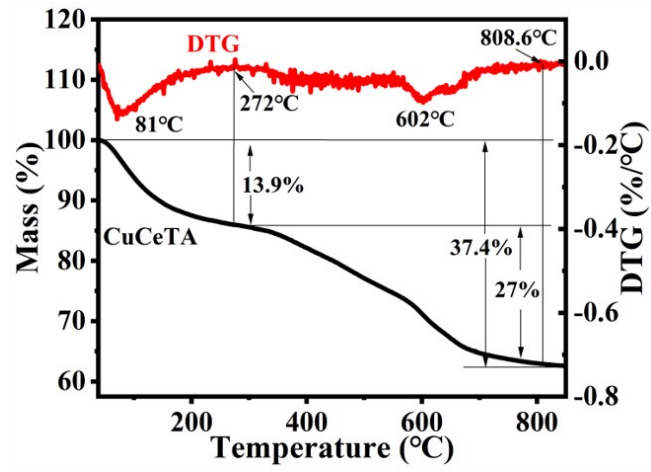

**Figure S6.** TGA and differential curve of CuCeTA.

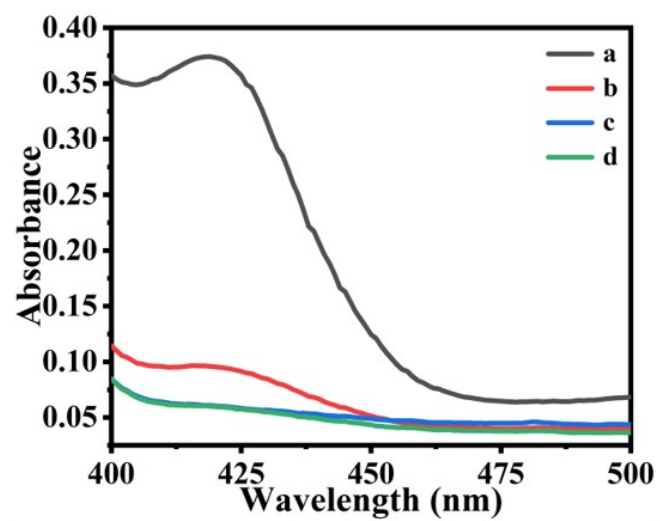

**Figure S7.** The POD-like activity of CuCeTA: a) ABTS + H<sub>2</sub>O<sub>2</sub> + CuCeTA; b) ABTS + H<sub>2</sub>O<sub>2</sub>; c) ABTS + CuCeTA; d) ABTS.

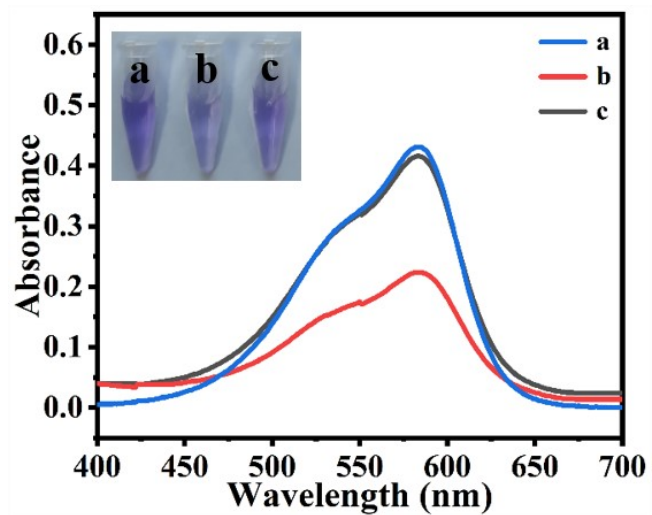

**Figure S8.** MV experiment to verify the production of  $\cdot\text{OH}$ : a) MV + CuCeTA; b) MV + CuCeTA +  $\text{H}_2\text{O}_2$ ; c) MV +  $\text{H}_2\text{O}_2$ . Insert was corresponding photos.



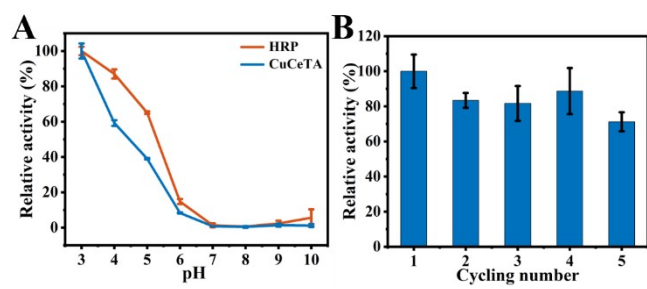

**Figure S9.** A) The catalytic activity of HRP and CuCeTA in different pH; B) The cycling experiment of CuCeTA.

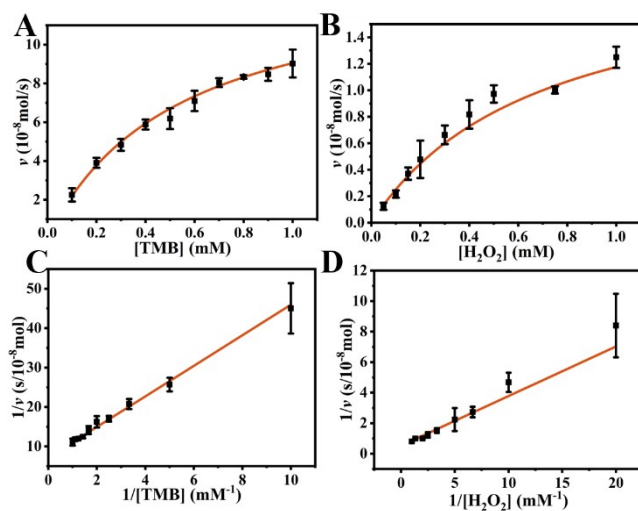

**Figure S10.** Steady-state kinetic assay for TMB (A and C) and H<sub>2</sub>O<sub>2</sub> (B and D) of CuCeTA nanozyme.

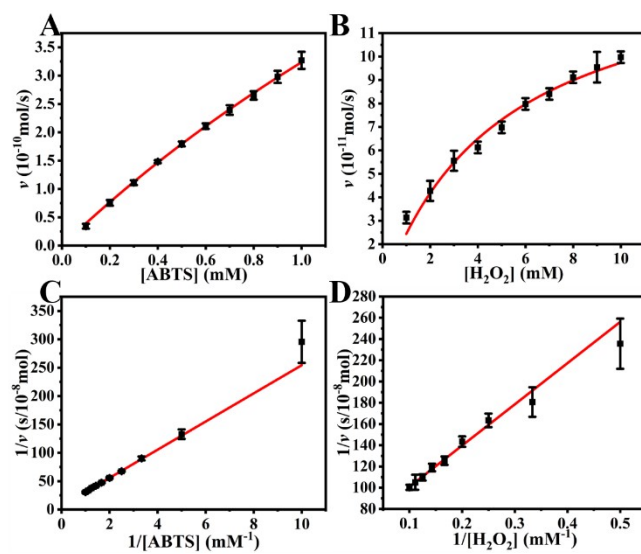

**Figure S11.** Steady-state kinetic assay for ABTS (A and C) and  $H_2O_2$  (B and D) of CuCeTA nanozyme.

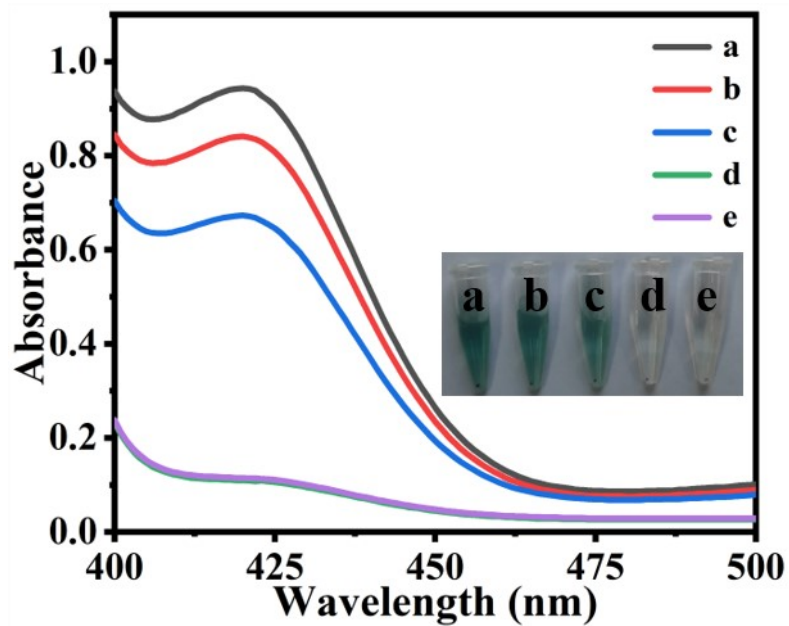

**Figure S12.** The influence of glyphosate on the catalytic activity of CuCeTA with ABTS as the chromogenic substrate: a: ABTS + H<sub>2</sub>O<sub>2</sub> + CuCeTA; b: ABTS + H<sub>2</sub>O<sub>2</sub> + glyphosate (50 ppm) + CuCeTA; c: ABTS + H<sub>2</sub>O<sub>2</sub> + glyphosate (500 ppm) + CuCeTA; d: ABTS + glyphosate (50 ppm) + CuCeTA; e: ABTS + glyphosate (500 ppm) + CuCeTA. Insert was corresponding photos.

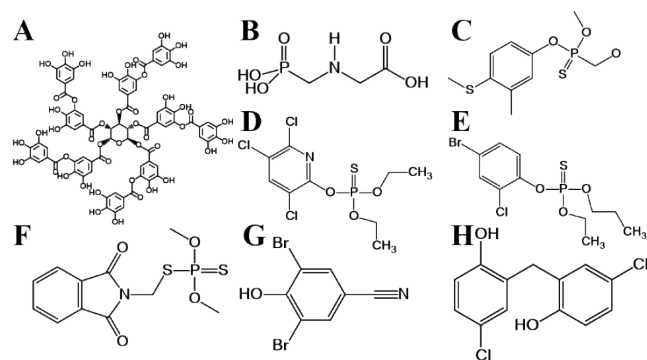

**Figure S13.** Structural formula of TA and several common pesticides, A) TA; B) glyphosate; C) fenthion; D) chlorpyrifos; E) profenofos; F) phosmet; G) bromoxynil; H) dichlorophene.

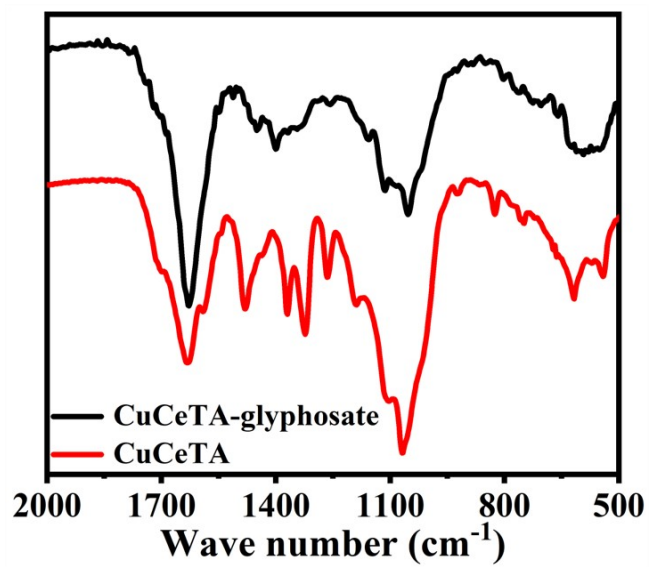

**Figure S14.** The partial enlarged FTIR of CuCeTA and CuCeTA-glyphosate.

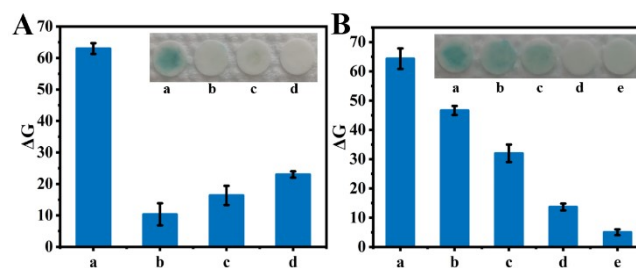

**Figure S15.** A) The validation experiment of CuCeTA catalytic activity on test paper (a: TMB + H<sub>2</sub>O<sub>2</sub> + CuCeTA; b: TMB + H<sub>2</sub>O<sub>2</sub>; c: TMB + CuCeTA; d: only TMB); B) The catalytic activity inhibition of glyphosate to CuCeTA (a: TMB + H<sub>2</sub>O<sub>2</sub> + CuCeTA; b: TMB + H<sub>2</sub>O<sub>2</sub> + glyphosate (50 ppm) + CuCeTA; c: TMB + H<sub>2</sub>O<sub>2</sub> + glyphosate (500 ppm) + CuCeTA; d: TMB + glyphosate (50 ppm) + CuCeTA; e: TMB + glyphosate (500 ppm) + CuCeTA).

**Table S1.** The content of element from XPS.

| <b>Element</b>     | <b>Cu 2p</b> | <b>Ce 3d</b> | <b>O 1s</b> | <b>C 1s</b> |
|--------------------|--------------|--------------|-------------|-------------|
| <b>Content (%)</b> | 2.55         | 11.06        | 29.11       | 7           |



**Table S2.** Comparison of  $K_m$  and  $V_{max}$  between CuCeTA and other catalysts with TMB as the chromogenic substrate.

| Catalyst         | TMB           |                                                    | H <sub>2</sub> O <sub>2</sub> |                                                    | Ref.      |
|------------------|---------------|----------------------------------------------------|-------------------------------|----------------------------------------------------|-----------|
|                  | $K_m$<br>[mM] | $V_{max}$<br>[10 <sup>-8</sup> M s <sup>-1</sup> ] | $K_m$<br>[mM]                 | $V_{max}$<br>[10 <sup>-8</sup> M s <sup>-1</sup> ] |           |
| CuCeT<br>A       | 0.543         | 0.139                                              | 0.620                         | 1.92                                               | This work |
| HRP              | 0.434         | 10.0                                               | 3.7                           | 8.71                                               | [1]       |
| H@M              | 0.068         | 6.07                                               | 10.9                          | 8.98                                               | [1]       |
| GeO <sub>2</sub> | 0.420         | 23.297                                             | 1.75                          | 23.4                                               | [2]       |

**Table S3.** Comparison of  $K_m$  and  $V_{max}$  between CuCeTA and other catalysts with ABTS as the chromogenic substrate.

| Catalyst             | ABTS          |                                     | $H_2O_2$      |                                     | Ref.      |
|----------------------|---------------|-------------------------------------|---------------|-------------------------------------|-----------|
|                      | $K_m$<br>[mM] | $V_{max}$<br>[ $10^{-8} M s^{-1}$ ] | $K_m$<br>[mM] | $V_{max}$<br>[ $10^{-8} M s^{-1}$ ] |           |
| CuCeTA               | 3.91          | 0.163                               | 6.24          | 0.016                               | This work |
| HRP                  | 0.16          | 29.88                               | 0.29          | 32.93                               | [3]       |
| PBNPs                | 1.08          | 31.4                                | 17.1          | 29.3                                | [4]       |
| Cys-MoS <sub>2</sub> | 0.15          | 16.1                                | 8.06          | 99.2                                | [5]       |
| GQDs                 | 10.4          | 1.78                                | 1.17          | 1.24                                | [6]       |

## Notes and references

- 1 F. X. Qin, S. Y. Jia, F. F. Wang, S. H. Wu, J. Song and Y. Liu, *Catal. Sci. Technol.*, 2013, **3**, 2761.
- 2 X. Liang and L. Han, *Adv. Funct. Mater.*, 2020, **30**, 2001933.
- 3 W. Bing, H. J. Sun, F. M. Wang, Y. Q. Song and J. S. Ren, *J. Mater. Chem. B.*, 2018, **6**, 4062.
- 4 W. Zhang, S. L. Hu, J. J. Yin, W. W. He, W. Lu, M. Ma, N. Gu and Y. Zhang, *J. Am. Chem. Soc.*, 2016, **138**, 5860.
- 5 J. Yu, D. Q. Ma, L. Q. Mei, Q. Gao, W. Y. Yin, X. Zhang, L. Yan, Z. J. Gu, X. Y. Ma and Y. L. Zhao, *J. Mater. Chem. B.*, 2018, **6**, 487.
- 6 H. J. Sun, A. D. Zhao, N. Gao, K. Li, J. S. Ren and X. G. Qu, *Angew. Chem. Int. Ed.*, 2015, **54**, 7176.
